# Supplementary material for: Sex-specific diagnostic efficacy of MRI in axial spondyloarthritis: challenging the ‘One Size Fits All’ notion
Source: PubMed Central journal article supplement — RMD Open. 2023 Oct 29;9(4):e003252. doi: 10.1136/rmdopen-2023-003252 (PMC10619004; doi:10.1136/rmdopen-2023-003252), 2023-10-29
Supplement: rmdopen-2023-003252supp002.pdf [file rmdopen-2023-003252supp002.pdf]

| Parameter                                                                                                                            |   | TP  | FP | TN | FN  | SE (95% CI)        | SP (95% CI)        | PPV (95% CI)       | NPV (95% CI)       | LR+ (95% CI)      | LR- (95% CI)    | DOR  |
|--------------------------------------------------------------------------------------------------------------------------------------|---|-----|----|----|-----|--------------------|--------------------|--------------------|--------------------|-------------------|-----------------|------|
| Ankylosis                                                                                                                            | F | 10  | 3  | 89 | 126 | 0.07 (0.04 – 0.13) | 0.97 (0.91 – 0.99) | 0.77 (0.49 – 0.92) | 0.41 (0.40 – 0.42) | 2.3 (0.6 – 8.0)   | 1.0 (0.9 – 1.0) | 2.4  |
|                                                                                                                                      | M | 59  | 1  | 54 | 184 | 0.24 (0.19 – 0.30) | 0.98 (0.90 – 1.00) | 0.98 (0.89 – 1.00) | 0.23 (0.21 – 0.24) | 13.3 (1.9 – 94.3) | 0.8 (0.7 – 0.8) | 17.3 |
| Erosion                                                                                                                              | F | 95  | 21 | 71 | 41  | 0.70 (0.61 – 0.77) | 0.77 (0.67 – 0.85) | 0.82 (0.75 – 0.87) | 0.63 (0.57 – 0.70) | 3.1 (2.1 – 4.5)   | 0.4 (0.3 – 0.5) | 7.8  |
|                                                                                                                                      | M | 167 | 7  | 48 | 76  | 0.69 (0.62 – 0.75) | 0.87 (0.76 – 0.95) | 0.96 (0.92 – 0.98) | 0.39 (0.34 – 0.44) | 5.4 (2.7 – 10.8)  | 0.4 (0.3 – 0.4) | 15.1 |
| Sclerosis                                                                                                                            | F | 102 | 52 | 40 | 34  | 0.75 (0.67 – 0.82) | 0.44 (0.33 – 0.54) | 0.66 (0.62 – 0.71) | 0.54 (0.45 – 0.63) | 1.3 (1.1 – 1.6)   | 0.6 (0.4 – 0.8) | 2.3  |
|                                                                                                                                      | M | 140 | 19 | 36 | 103 | 0.58 (0.51 – 0.64) | 0.66 (0.51 – 0.78) | 0.88 (0.83 – 0.92) | 0.26 (0.22 – 0.31) | 1.7 (1.1 – 2.4)   | 0.6 (0.5 – 0.8) | 2.6  |
| Fat metaplasia                                                                                                                       | F | 58  | 12 | 80 | 78  | 0.43 (0.34 – 0.51) | 0.87 (0.78 – 0.93) | 0.83 (0.73 – 0.89) | 0.51 (0.47 – 0.55) | 3.3 (1.9 – 5.7)   | 0.7 (0.6 – 0.8) | 5.0  |
|                                                                                                                                      | M | 143 | 2  | 52 | 100 | 0.59 (0.52 – 0.65) | 0.96 (0.87 – 1.00) | 0.99 (0.95 – 1.00) | 0.35 (0.31 – 0.38) | 16.2 (4.1 – 62.2) | 0.4 (0.4 – 0.5) | 37.9 |
| Bone marrow oedema                                                                                                                   | F | 84  | 27 | 65 | 52  | 0.62 (0.53 – 0.70) | 0.71 (0.60 – 0.80) | 0.76 (0.69 – 0.81) | 0.56 (0.49 – 0.62) | 2.1 (1.5 – 3.0)   | 0.5 (0.4 – 0.7) | 3.9  |
|                                                                                                                                      | M | 135 | 16 | 39 | 108 | 0.56 (0.49 – 0.62) | 0.71 (0.57 – 0.82) | 0.89 (0.85 – 0.93) | 0.27 (0.22 – 0.31) | 1.9 (1.3 – 2.9)   | 0.6 (0.5 – 0.8) | 3.0  |
| Erosion (middle and dorsal)                                                                                                          | F | 83  | 12 | 80 | 53  | 0.61 (0.52 – 0.69) | 0.87 (0.78 – 0.93) | 0.87 (0.80 – 0.92) | 0.60 (0.55 – 0.65) | 4.7 (2.7 – 8.1)   | 0.4 (0.4 – 0.6) | 10.4 |
|                                                                                                                                      | M | 155 | 6  | 49 | 88  | 0.64 (0.57 – 0.70) | 0.89 (0.78 – 0.96) | 0.96 (0.92 – 0.98) | 0.36 (0.32 – 0.40) | 5.8 (2.7 – 12.5)  | 0.4 (0.3 – 0.5) | 14.4 |
| Sclerosis (middle and dorsal)                                                                                                        | F | 85  | 35 | 57 | 51  | 0.63 (0.54 – 0.71) | 0.62 (0.51 – 0.72) | 0.71 (0.64 – 0.76) | 0.53 (0.46 – 0.59) | 1.6 (1.2 – 2.2)   | 0.6 (0.5 – 0.8) | 2.7  |
|                                                                                                                                      | M | 101 | 10 | 45 | 142 | 0.42 (0.35 – 0.48) | 0.82 (0.69 – 0.91) | 0.91 (0.85 – 0.95) | 0.24 (0.21 – 0.27) | 2.3 (1.3 – 4.1)   | 0.7 (0.6 – 0.8) | 3.2  |
| Fat metaplasia (middle and dorsal)                                                                                                   | F | 43  | 7  | 85 | 93  | 0.32 (0.24 – 0.40) | 0.92 (0.85 – 0.97) | 0.86 (0.74 – 0.93) | 0.48 (0.45 – 0.51) | 4.2 (2.0 – 8.8)   | 0.7 (0.7 – 0.8) | 5.6  |
|                                                                                                                                      | M | 131 | 2  | 53 | 112 | 0.54 (0.47 – 0.60) | 0.96 (0.87 – 1.00) | 0.99 (0.94 – 1.00) | 0.32 (0.29 – 0.35) | 14.8 (3.8 – 58.1) | 0.5 (0.4 – 0.6) | 31.0 |
| Bone marrow oedema (middle and dorsal)                                                                                               | F | 66  | 9  | 83 | 70  | 0.49 (0.40 – 0.57) | 0.90 (0.82 – 0.95) | 0.88 (0.79 – 0.93) | 0.54 (0.50 – 0.59) | 5.0 (2.6 – 9.5)   | 0.6 (0.5 – 0.7) | 8.7  |
|                                                                                                                                      | M | 114 | 9  | 46 | 129 | 0.47 (0.41 – 0.53) | 0.84 (0.71 – 0.92) | 0.93 (0.87 – 0.96) | 0.26 (0.23 – 0.29) | 2.9 (1.6 – 5.2)   | 0.6 (0.5 – 0.8) | 4.5  |
| Ankylosis and/or Erosion (middle and dorsal)                                                                                         | F | 90  | 14 | 78 | 46  | 0.66 (0.58 – 0.74) | 0.85 (0.76 – 0.91) | 0.87 (0.80 – 0.91) | 0.63 (0.57 – 0.69) | 4.3 (2.7 – 7.3)   | 0.4 (0.3 – 0.5) | 10.9 |
|                                                                                                                                      | M | 189 | 6  | 49 | 54  | 0.78 (0.72 – 0.83) | 0.89 (0.78 – 0.96) | 0.97 (0.94 – 0.99) | 0.48 (0.41 – 0.54) | 7.1 (3.3 – 15.2)  | 0.2 (0.2 – 0.3) | 28.6 |
| Ankylosis and/or Sclerosis (middle and dorsal)                                                                                       | F | 92  | 38 | 54 | 44  | 0.68 (0.59 – 0.75) | 0.59 (0.48 – 0.69) | 0.71 (0.65 – 0.76) | 0.55 (0.48 – 0.62) | 1.6 (1.3 – 2.2)   | 0.6 (0.4 – 0.7) | 3.0  |
|                                                                                                                                      | M | 150 | 10 | 45 | 93  | 0.62 (0.55 – 0.68) | 0.82 (0.69 – 0.91) | 0.94 (0.89 – 0.96) | 0.33 (0.28 – 0.37) | 3.4 (1.9 – 6.0)   | 0.5 (0.4 – 0.6) | 7.3  |
| Ankylosis and/or Fat metaplasia (middle and dorsal)                                                                                  | F | 44  | 8  | 84 | 92  | 0.32 (0.25 – 0.41) | 0.91 (0.84 – 0.96) | 0.85 (0.73 – 0.92) | 0.48 (0.44 – 0.51) | 3.7 (1.8 – 7.5)   | 0.7 (0.7 – 0.9) | 5.0  |
|                                                                                                                                      | M | 143 | 2  | 53 | 100 | 0.59 (0.52 – 0.65) | 0.96 (0.87 – 1.00) | 0.99 (0.95 – 1.00) | 0.35 (0.31 – 0.38) | 16.2 (4.1 – 63.3) | 0.4 (0.4 – 0.5) | 37.9 |
| Ankylosis and/or Bone marrow oedema (middle and dorsal)                                                                              | F | 73  | 11 | 81 | 63  | 0.54 (0.45 – 0.62) | 0.88 (0.80 – 0.94) | 0.87 (0.79 – 0.92) | 0.56 (0.51 – 0.61) | 4.5 (2.5 – 8.0)   | 0.5 (0.4 – 0.6) | 8.5  |
|                                                                                                                                      | M | 161 | 9  | 46 | 82  | 0.66 (0.60 – 0.72) | 0.84 (0.71 – 0.92) | 0.95 (0.91 – 0.97) | 0.36 (0.31 – 0.41) | 4.0 (2.2 – 7.4)   | 0.4 (0.3 – 0.5) | 10.0 |
| Ankylosis and/or Erosion (middle and dorsal) and/or Sclerosis (middle and dorsal)                                                    | F | 108 | 40 | 52 | 28  | 0.79 (0.72 – 0.86) | 0.57 (0.46 – 0.67) | 0.73 (0.68 – 0.78) | 0.65 (0.56 – 0.73) | 1.8 (1.4 – 2.3)   | 0.4 (0.3 – 0.5) | 5.0  |
|                                                                                                                                      | M | 196 | 14 | 41 | 47  | 0.81 (0.75 – 0.85) | 0.75 (0.61 – 0.85) | 0.93 (0.90 – 0.96) | 0.47 (0.39 – 0.54) | 3.2 (2.0 – 5.0)   | 0.3 (0.2 – 0.4) | 12.2 |
| Ankylosis and/or Erosion (middle and dorsal) and/or Fat metaplasia (middle and dorsal)                                               | F | 90  | 16 | 76 | 46  | 0.66 (0.56 – 0.74) | 0.83 (0.73 – 0.90) | 0.85 (0.78 – 0.90) | 0.62 (0.56 – 0.68) | 3.8 (2.4 – 6.0)   | 0.4 (0.3 – 0.5) | 9.3  |
|                                                                                                                                      | M | 192 | 7  | 48 | 51  | 0.79 (0.73 – 0.84) | 0.87 (0.76 – 0.95) | 0.97 (0.93 – 0.98) | 0.49 (0.42 – 0.55) | 6.2 (3.1 – 12.4)  | 0.2 (0.2 – 0.3) | 25.8 |
| Ankylosis and/or Erosion (middle and dorsal) and/or Bone marrow edema (middle and dorsal)                                            | F | 102 | 19 | 73 | 34  | 0.75 (0.67 – 0.82) | 0.79 (0.70 – 0.87) | 0.84 (0.78 – 0.89) | 0.68 (0.61 – 0.75) | 3.6 (2.4 – 5.5)   | 0.3 (0.2 – 0.4) | 11.5 |
|                                                                                                                                      | M | 199 | 15 | 40 | 44  | 0.82 (0.76 – 0.87) | 0.73 (0.59 – 0.84) | 0.93 (0.90 – 0.95) | 0.48 (0.40 – 0.55) | 3.0 (1.9 – 4.6)   | 0.2 (0.2 – 0.3) | 12.1 |
| Ankylosis and/or Erosion (middle and dorsal) and/or Fat metaplasia (middle and dorsal) and/or Bone marrow oedema (middle and dorsal) | F | 102 | 21 | 71 | 34  | 0.75 (0.67 – 0.82) | 0.77 (0.67 – 0.85) | 0.83 (0.77 – 0.88) | 0.68 (0.60 – 0.74) | 3.3 (2.2 – 4.8)   | 0.3 (0.2 – 0.4) | 10.1 |
|                                                                                                                                      | M | 202 | 16 | 39 | 41  | 0.83 (0.78 – 0.88) | 0.71 (0.57 – 0.82) | 0.93 (0.89 – 0.95) | 0.49 (0.41 – 0.57) | 2.9 (1.9 – 4.3)   | 0.2 (0.2 – 0.3) | 12.0 |
| Fat metaplasia (middle and dorsal) and/or Erosion (middle and dorsal) and/or Bone marrow oedema (middle and dorsal)                  | F | 101 | 20 | 72 | 35  | 0.74 (0.66 – 0.81) | 0.78 (0.68 – 0.86) | 0.84 (0.77 – 0.88) | 0.67 (0.60 – 0.74) | 3.4 (2.3 – 5.1)   | 0.3 (0.2 – 0.5) | 10.4 |
|                                                                                                                                      | M | 196 | 16 | 39 | 47  | 0.81 (0.75 – 0.85) | 0.71 (0.57 – 0.82) | 0.93 (0.89 – 0.95) | 0.45 (0.38 – 0.53) | 2.8 (1.8 – 4.2)   | 0.3 (0.2 – 0.4) | 10.2 |
| Fat metaplasia and/or Erosion                                                                                                        | F | 100 | 27 | 65 | 36  | 0.74 (0.65 – 0.81) | 0.71 (0.60 – 0.80) | 0.79 (0.73 – 0.84) | 0.64 (0.57 – 0.71) | 2.5 (1.8 – 3.5)   | 0.4 (0.3 – 0.5) | 6.7  |
|                                                                                                                                      | M | 194 | 8  | 47 | 49  | 0.80 (0.74 – 0.85) | 0.86 (0.73 – 0.94) | 0.96 (0.93 – 0.98) | 0.49 (0.42 – 0.56) | 5.5 (2.9 – 10.4)  | 0.2 (0.2 – 0.3) | 23.3 |
| Fat metaplasia (middle and dorsal) and/or Erosion (middle and dorsal)                                                                | F | 89  | 15 | 77 | 47  | 0.65 (0.57 – 0.73) | 0.84 (0.75 – 0.91) | 0.86 (0.79 – 0.91) | 0.62 (0.56 – 0.68) | 4.0 (2.5 – 6.5)   | 0.4 (0.3 – 0.5) | 9.7  |
|                                                                                                                                      | M | 186 | 7  | 48 | 57  | 0.77 (0.71 – 0.82) | 0.87 (0.76 – 0.95) | 0.96 (0.93 – 0.98) | 0.46 (0.40 – 0.52) | 6.0 (3.0 – 12.1)  | 0.3 (0.2 – 0.3) | 22.4 |

**Supplement 1. Diagnostic performance.** TP=true positive. FP=false positive. TN=True negative. FN=false negative. LR+=positive likelihood ratio. SE=sensitivity. SP=specificity. PPV=positive predictive value. NPV=negative predictive value. LR-=negative likelihood ratio. DOR=diagnostic odds ratio (LR+ / LR-). 95% CI = 95% confidence interval.
