# Supplementary material for: Sex-specific diagnostic efficacy of MRI in axial spondyloarthritis: challenging the ‘One Size Fits All’ notion
Source: PubMed Central journal article supplement — RMD Open. 2023 Oct 29;9(4):e003252. doi: 10.1136/rmdopen-2023-003252 (PMC10619004; doi:10.1136/rmdopen-2023-003252), 2023-10-29
Supplement: rmdopen-2023-003252supp003.pdf [file rmdopen-2023-003252supp003.pdf]

**Supplement 1. Diagnostic performance and disease duration.** SE=sensitivity. SP=specificity. DOR=diagnostic odds ratio (LR+ / LR-). F=female patients. M=male patients. n/a=ratio mathematically not computable.

| Parameter         | Sex | <18 months<br>(n=56; 27 F) |      |      | 18 months – 5 years<br>(n= 112; 44 F) |      |      | ≥ 5 years<br>(n=279; 121 F) |      |      |
|-------------------|-----|----------------------------|------|------|---------------------------------------|------|------|-----------------------------|------|------|
|                   |     | SE                         | SP   | DOR  | SE                                    | SP   | DOR  | SE                          | SP   | DOR  |
| Ankylosis         | F   | 0.07                       | 1.00 | n/a  | 0.00                                  | 0.94 | 0.0  | 0.10                        | 0.97 | 4.1  |
|                   | M   | 0.05                       | 1.00 | n/a  | 0.15                                  | 1.00 | n/a  | 0.30                        | 0.94 | 6.3  |
| Erosion           | F   | 0.67                       | 0.92 | 22.0 | 0.77                                  | 0.72 | 8.7  | 0.67                        | 0.82 | 9.3  |
|                   | M   | 0.45                       | 0.89 | 6.5  | 0.79                                  | 0.81 | 16.2 | 0.70                        | 0.81 | 10.3 |
| Sclerosis         | F   | 0.60                       | 0.67 | 3.0  | 0.81                                  | 0.39 | 2.7  | 0.78                        | 0.44 | 2.7  |
|                   | M   | 0.50                       | 0.33 | 0.5  | 0.67                                  | 0.75 | 6.2  | 0.56                        | 0.75 | 3.8  |
| Fat metaplasia    | F   | 0.27                       | 0.92 | 4.0  | 0.35                                  | 0.78 | 1.9  | 0.45                        | 0.92 | 9.9  |
|                   | M   | 0.35                       | 1.00 | n/a  | 0.65                                  | 0.94 | 28.3 | 0.60                        | 1.00 | n/a  |
| Bone marrow edema | F   | 0.60                       | 0.67 | 3.0  | 0.69                                  | 0.78 | 7.9  | 0.62                        | 0.74 | 4.8  |
|                   | M   | 0.65                       | 0.78 | 6.5  | 0.60                                  | 0.81 | 6.4  | 0.55                        | 0.56 | 1.6  |
