# Supplementary material for: Sex-specific diagnostic efficacy of MRI in axial spondyloarthritis: challenging the ‘One Size Fits All’ notion
Source: PubMed Central journal article supplement — RMD Open. 2023 Oct 29;9(4):e003252. doi: 10.1136/rmdopen-2023-003252 (PMC10619004; doi:10.1136/rmdopen-2023-003252), 2023-10-29
Supplement: rmdopen-2023-003252supp004.pdf [file rmdopen-2023-003252supp004.pdf]

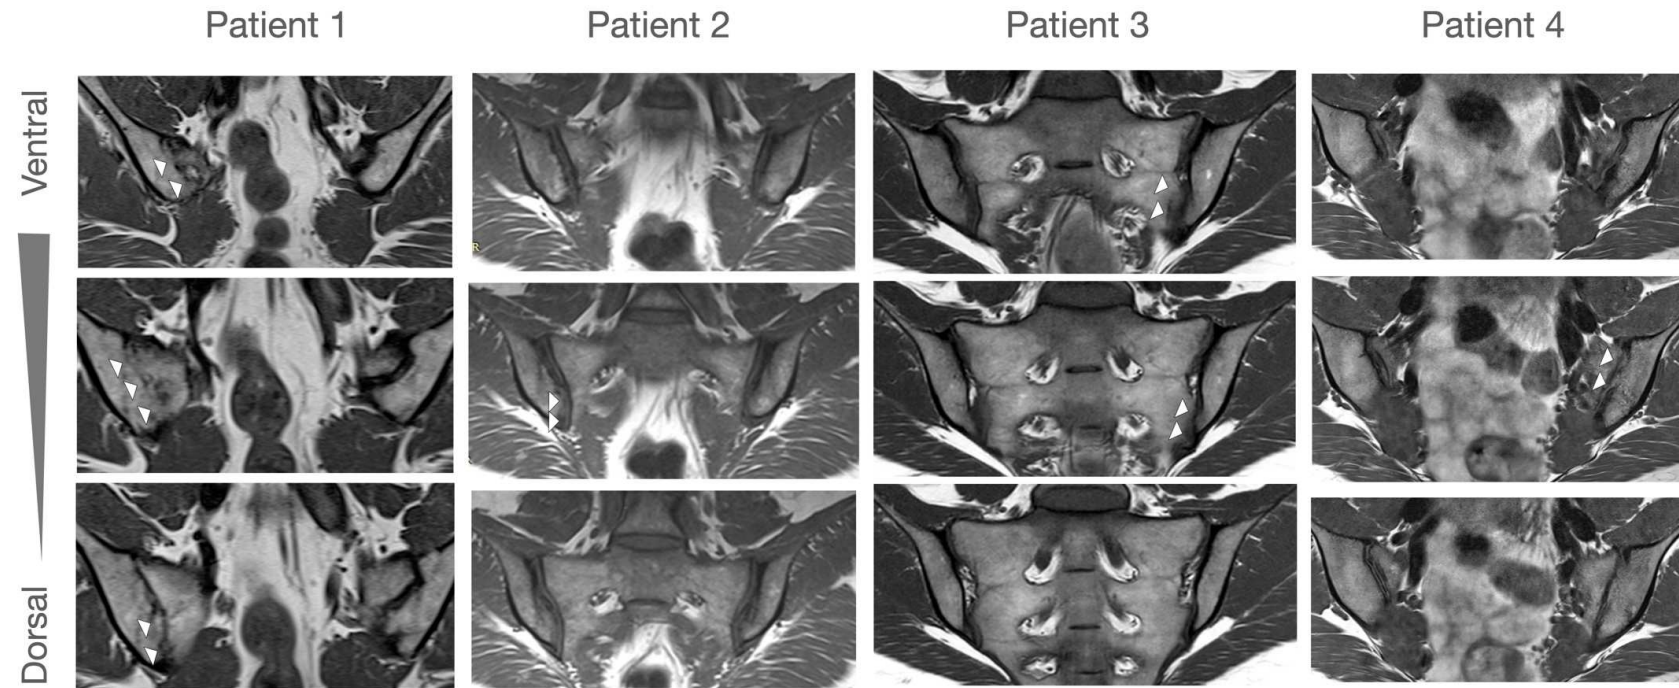

**Supplemental Figure 3. Ankylosis in controls.** Imaging examples of ankylosis in controls. Only T1 weighted images are shown. White arrowheads indicate areas of partial ankylosis.
